# Supplementary material for: First Insight into the Variation of the Milk Serum Proteome within and between Individual Cows
Source: MDPI journal article supplement (doi:10.3390/dairy3010004), 2022-01-14
Supplement: s1 [file s1]

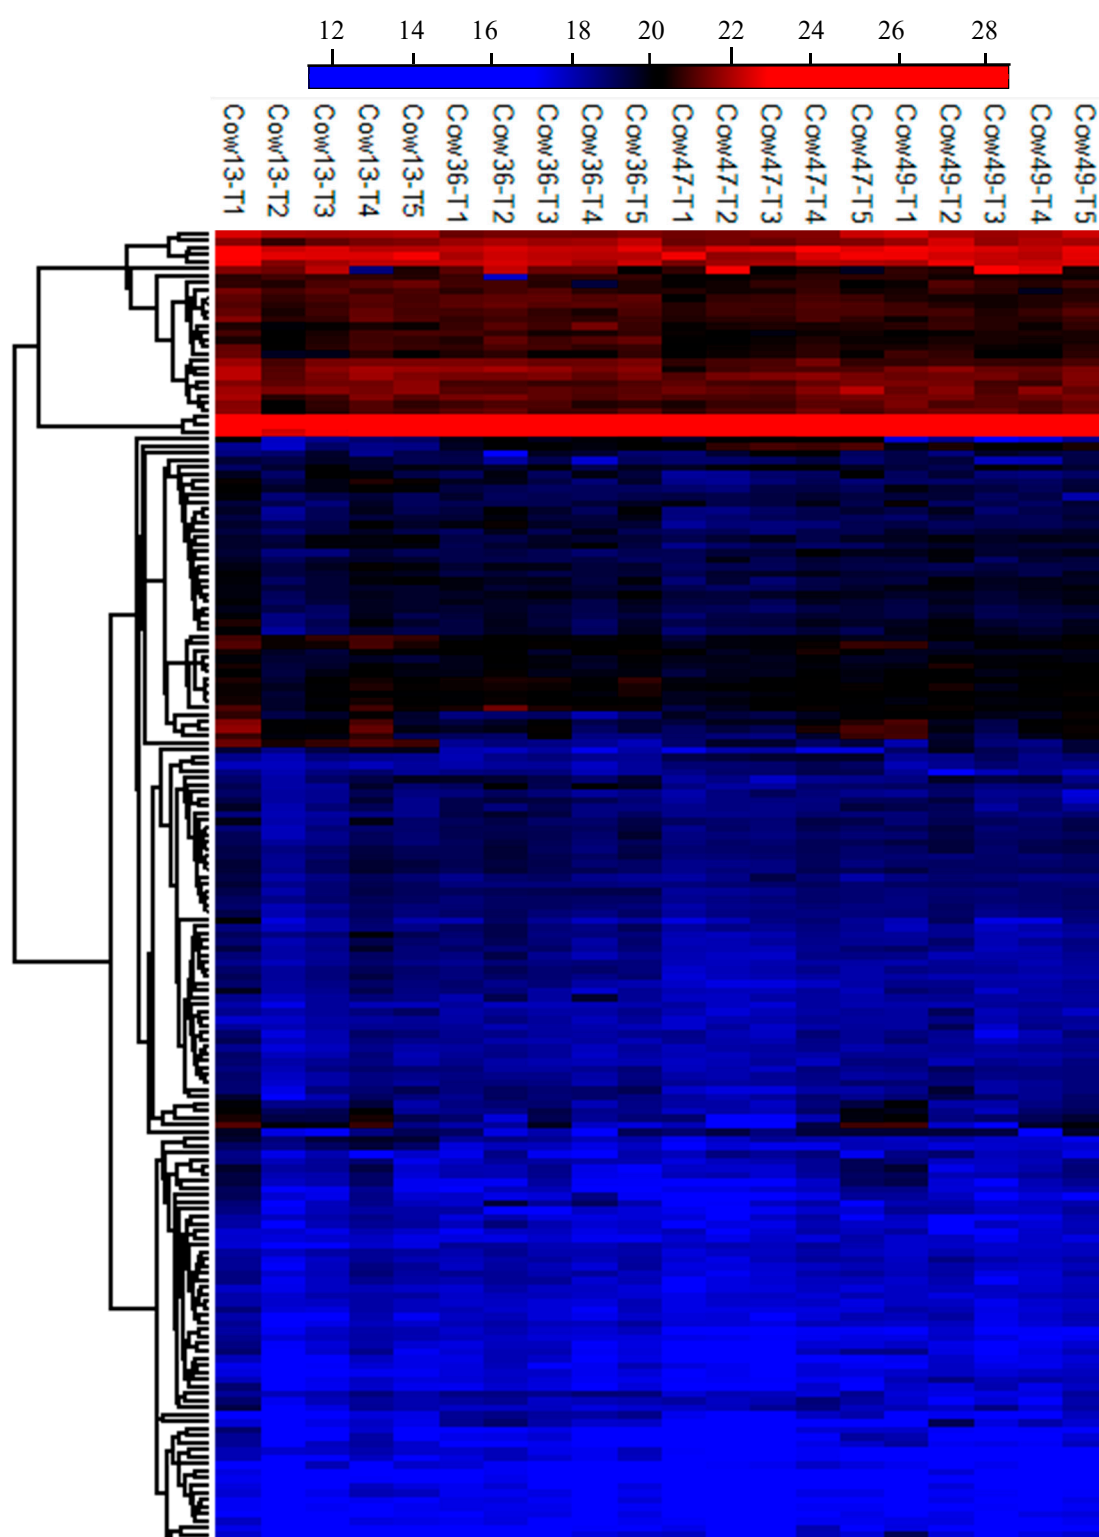

Figure S1 Heat map and hierarchical cluster of log<sub>2</sub> iBAQ value of proteins from 4 cows with 5 time points during middle lactation stage (Two months after the beginning of the lactation and two months before the end of lactation).

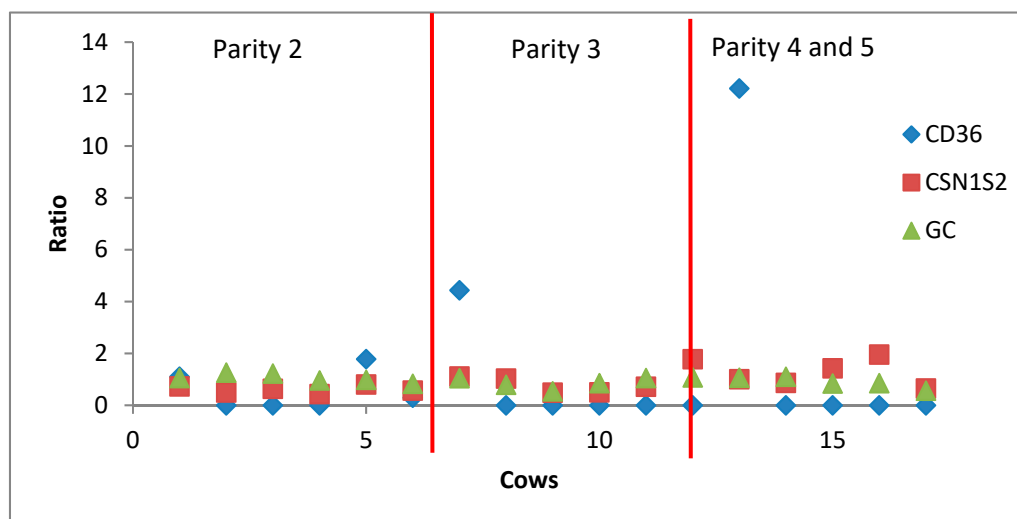

Figure S2 The distribution of the significantly different proteins associated with parity in 17 cows

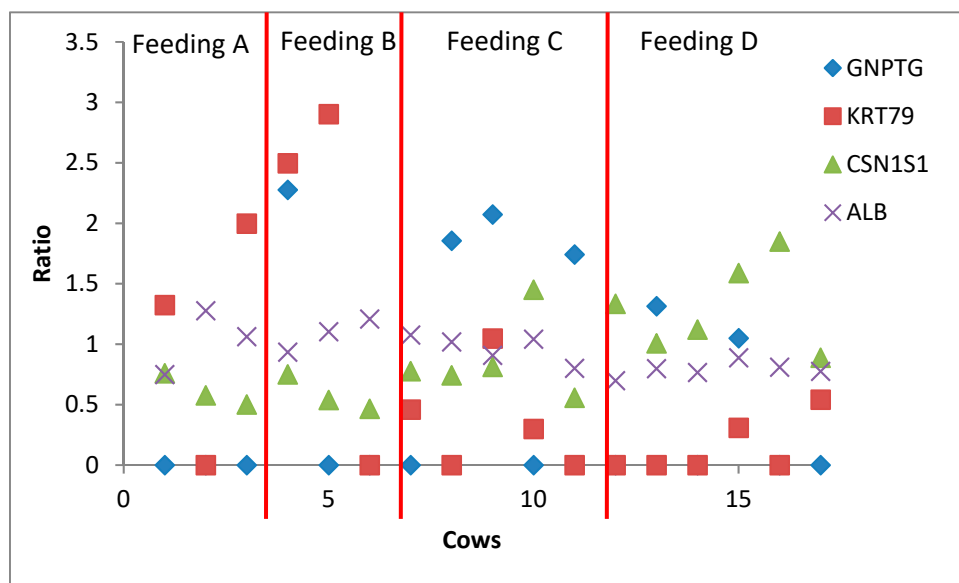

Figure S3 The distribution of the significantly different proteins associated with feeding in 17 cows
